# Supplementary material
Source: PubMed Central journal article supplement (PMC5568488)

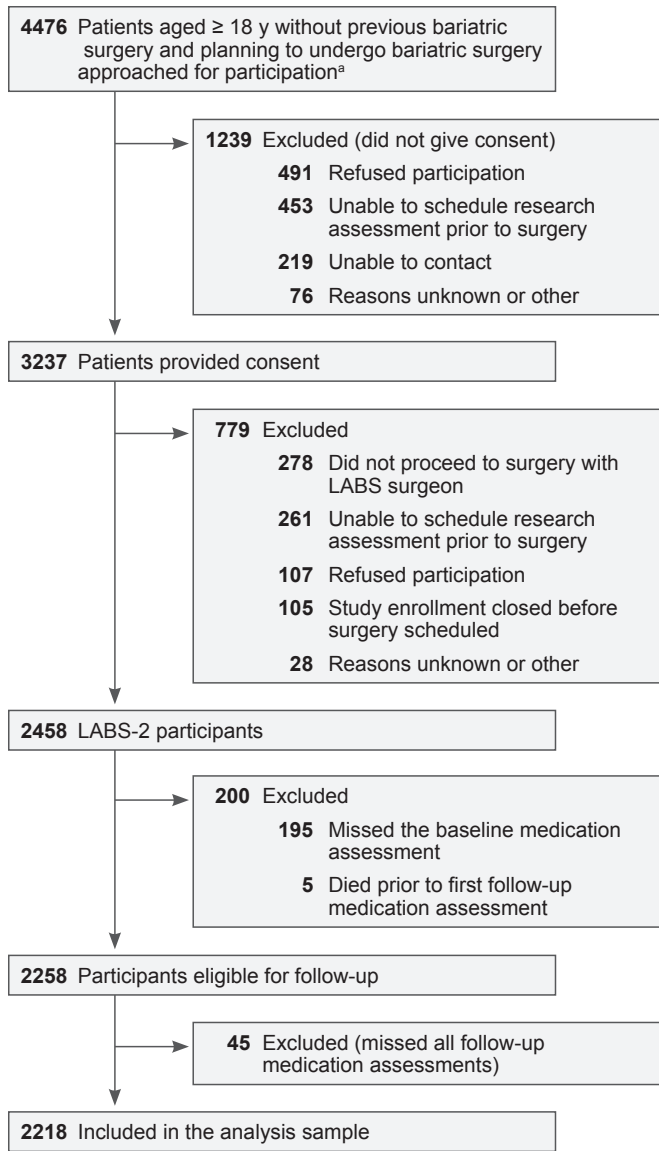

Supplement: NIHMS867906-supplement-1.pdf [file NIHMS867906-supplement-1.pdf]
